# Supplementary material for: Health Literacy is Associated with Health Behaviors in Students from Vocational Education and Training Schools: A Danish Population-Based Survey
Source: MDPI journal article supplement (doi:10.3390/ijerph17020671), 2020-01-20
Supplement: s1 [file s1]

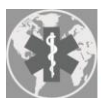

1 **Supplementary Materials S1. Table S1**

2 **Table S1:** Associations between health literacy domains and health behavior among VET-school  
3 students 19+ years old.

|                          | Scale 3. Managing health |               |              |               | Scale 5. Appraisal of health information |               |              |               |
|--------------------------|--------------------------|---------------|--------------|---------------|------------------------------------------|---------------|--------------|---------------|
|                          | Crude                    |               | Adjusted*    |               | Crude                                    |               | Adjusted*    |               |
|                          | OR                       | (95% CI)      | OR           | (95% CI)      | OR                                       | (95% CI)      | OR           | (95% CI)      |
| <b>Dietary habits</b>    |                          |               |              |               |                                          |               |              |               |
| Every day (ref)          | 1                        |               | 1            |               | 1                                        |               | 1            |               |
| Somedays                 | <b>0.604</b>             | (0.530-0.687) | <b>0.666</b> | (0.582-0.762) | <b>0.753</b>                             | (0.663-0.855) | <b>0.833</b> | (0.729-0.951) |
| Seldom or never          | <b>0.482</b>             | (0.422-0.550) | <b>0.548</b> | (0.478-0.629) | <b>0.624</b>                             | (0.549-0.710) | <b>0.700</b> | (0.612-0.801) |
| <b>Smoking status</b>    |                          |               |              |               |                                          |               |              |               |
| Never (ref)              |                          |               |              |               |                                          |               |              |               |
| Former                   | 0.970                    | (0.846-1.113) | 0.955        | (0.826-1.104) | 0.879                                    | (0.759-1.019) | 0.876        | (0.759-1.011) |
| Occasional               | 0.877                    | (0.703-1.095) | 0.910        | (0.718-1.154) | 0.821                                    | (0.657-1.026) | 0.868        | (0.686-1.098) |
| Daily                    | <b>0.613</b>             | (0.531-0.708) | <b>0.666</b> | (0.572-0.775) | <b>0.736</b>                             | (0.639-0.847) | <b>0.794</b> | (0.686-0.918) |
| <b>Alcohol</b>           |                          |               |              |               |                                          |               |              |               |
| No-low risk (ref)        |                          |               |              |               |                                          |               |              |               |
| Intermediate risk        | <i>0.844</i>             | (0.701-1.016) | 0.907        | (0.745-1.103) | <b>0.770</b>                             | (0.639-0.927) | <i>0.843</i> | (0.695-1.022) |
| High risk                | <b>0.641</b>             | (0.543-0.758) | <b>0.759</b> | (0.633-0.909) | <b>0.689</b>                             | (0.583-0.816) | <b>0.831</b> | (0.695-0.993) |
| <b>Physical activity</b> |                          |               |              |               |                                          |               |              |               |
| High (ref)               |                          |               |              |               |                                          |               |              |               |
| Moderate                 | <b>0.724</b>             | (0.623-0.841) | <b>0.702</b> | (0.598-0.825) | 0.879                                    | (0.759-1.019) | <b>0.841</b> | (0.720-0.983) |
| Low                      | <b>0.396</b>             | (0.345-0.455) | <b>0.430</b> | (0.372-0.498) | <b>0.611</b>                             | (0.537-0.695) | <b>0.642</b> | (0.560-0.736) |

Adjusted for gender, age, educational level, main educational area, self-rated health, BMI

Bold: p<0.05, Italic: p<0.1
